# Supplementary material
Source: PubMed Central journal article supplement (PMC9742127)
Supplement: NIHMS1843106-supplement-Supplemental_Publication_Material.pdf [file NIHMS1843106-supplement-Supplemental_Publication_Material.pdf]

## Online Supplement

Long-term Adiposity and Midlife Carotid Intima-media Thickness Are Linked Partly through Intermediate Risk Factors

Tao Zhang<sup>1,2\*</sup>, Bingbing Fan<sup>1,2\*</sup>, Shengxu Li<sup>3</sup>, Xuan Wang<sup>4</sup>, Yawei Kong<sup>5</sup>, Lydia Bazzano<sup>4</sup>, Jiang He<sup>4</sup>, Wei Chen<sup>4</sup>, Yinkun Yan<sup>5</sup>

\* Equally contributed

<sup>1</sup> Department of Biostatistics, School of Public Health, Cheeloo College of Medicine, Shandong University, Jinan, Shandong, China

<sup>2</sup> National Institute of Health Data Science, Shandong University, Jinan, Shandong, China

<sup>3</sup> Children's Minnesota Research Institute, Children's Minnesota, Minneapolis, MN, USA

<sup>4</sup> Department of Epidemiology, School of Public Health and Tropical Medicine, Tulane University, New Orleans, LA, USA

<sup>5</sup> Center for Non-communicable Disease Management, Beijing Children's Hospital, Capital Medical University, National Center for Children's Health, Beijing, China

**Running Title:** Obesity-Atherosclerosis via Third Variables

**Correspondence:**

Yinkun Yan, MD, PhD

Center for Non-communicable Disease Management, Beijing Children's Hospital

56 Nanlishi Road, Xicheng District, Beijing, 100045, China

E-mail address: ykyan2011@163.com

Tel: (86) 10-59617065; Fax: (86) 10-59617038

**Table S1.** Mediation effect parameters in one model with parallel multiple mediators and with cIMT as the outcome

| Predictor     | Mediator      | c              | $\beta_1$      | $\beta_2$      | $\beta_{Ind}$          | c'                    | Mediation effect (%) |
|---------------|---------------|----------------|----------------|----------------|------------------------|-----------------------|----------------------|
| Childhood BMI | Adult SBP     | 0.138 (0.025)* | 0.080 (0.025)* | 0.141 (0.027)* | 0.011 [0.004, 0.021]*  | 0.116 [0.057, 0.174]* | 8.0 [0.9, 15.1]*     |
|               | Adult LDLC    | 0.138 (0.025)* | 0.004 (0.027)  | 0.089 (0.025)* | 0.000 [-0.006, 0.006]  | 0.116 [0.057, 0.174]* | 0.0 [-4.3, 4.3]      |
|               | Adult AIP     | 0.138 (0.025)* | 0.106 (0.025)* | 0.047 (0.028)  | 0.005 [-0.001, 0.011]  | 0.116 [0.057, 0.174]* | 3.6 [-0.7, 7.9]      |
|               | Adult Glucose | 0.138 (0.025)* | 0.094 (0.026)* | 0.063 (0.026)* | 0.006 [0.000, 0.013]*  | 0.116 [0.057, 0.174]* | 4.3 [0.0, 8.7]*      |
| Adult BMI     | Adult SBP     | 0.111 (0.025)* | 0.185 (0.025)* | 0.142 (0.027)* | 0.026 [ 0.013, 0.043]* | 0.046 [-0.025, 0.124] | 23.4 [9.7, 37.1]*    |
|               | Adult LDLC    | 0.111 (0.025)* | 0.095 (0.027)* | 0.084 (0.025)* | 0.008 [ 0.002, 0.017]* | 0.046 [-0.025, 0.124] | 7.2 [-0.1, 14.5]     |
|               | Adult AIP     | 0.111 (0.025)* | 0.299 (0.024)* | 0.046 (0.029)  | 0.014 [-0.003, 0.032]  | 0.046 [-0.025, 0.124] | 12.6 [-2.2, 27.4]    |
|               | Adult Glucose | 0.111 (0.025)* | 0.264 (0.026)* | 0.063 (0.027)* | 0.017 [ 0.001, 0.034]* | 0.046 [-0.025, 0.124] | 15.3 [1.7, 28.9]*    |
| BMI AUC       | Adult SBP     | 0.150 (0.025)* | 0.166 (0.024)* | 0.135 (0.027)* | 0.022 [0.011, 0.037]*  | 0.103 [0.037, 0.180]* | 14.7 [5.6, 23.7]*    |
|               | Adult LDLC    | 0.150 (0.025)* | 0.037 (0.027)  | 0.087 (0.025)* | 0.003 [-0.002, 0.010]  | 0.103 [0.037, 0.180]* | 2.0 [-1.9, 5.9]      |
|               | Adult AIP     | 0.150 (0.025)* | 0.222 (0.024)* | 0.039 (0.028)  | 0.009 [-0.003, 0.022]  | 0.103 [0.037, 0.180]* | 6.0 [-1.6, 13.6]     |
|               | Adult Glucose | 0.150 (0.025)* | 0.270 (0.025)* | 0.049 (0.027)  | 0.013 [-0.002, 0.031]  | 0.103 [0.037, 0.180]* | 8.7 [-2.4, 19.7]     |

c,  $\beta_1$ , and  $\beta_2$  are standardized regression coefficients (standardized errors).  $\beta_{Ind}$  and c' are standardized regression coefficients [95% confidence intervals]. Mediation effects are percentages [95% confidence intervals].

c=total effect; c'=direct effect;  $\beta_1$ =indirect effect 1;  $\beta_2$ =indirect effect 2;  $\beta_{Ind}$ =indirect effect ( $\beta_1 \times \beta_2$ )

\*,  $P < 0.05$  for being different from 0

cIMT=carotid intima-media thickness; BMI=body mass index; SBP=systolic blood pressure; LDLC=low-density lipoprotein cholesterol; AIP=atherogenic index of plasma; AUC=area under the curve

Covariates in the models were race, sex, follow-up years, adult age, smoking and alcohol drinking.

**Table S2.** Mediation effect parameters in one model with parallel multiple mediators and with cIMT as the outcome

| Predictor     | Mediator      | c              | $\beta_1$      | $\beta_2$      | $\beta_{Ind}$         | c'                    | Mediation effect (%) |
|---------------|---------------|----------------|----------------|----------------|-----------------------|-----------------------|----------------------|
| Childhood BMI | Adult SBP     | 0.121 (0.025)* | 0.065 (0.024)* | 0.137 (0.027)* | 0.009 [0.002, 0.018]* | 0.105 [0.049, 0.164]* | 7.4 [0.7, 14.1]*     |
|               | Adult LDLC    | 0.121 (0.025)* | 0.009 (0.027)  | 0.095 (0.025)* | 0.001 [-0.005, 0.007] | 0.105 [0.049, 0.164]* | 0.8 [-4.0, 5.7]      |
|               | Adult AIP     | 0.121 (0.025)* | 0.088 (0.025)* | 0.038 (0.028)  | 0.003 [-0.001, 0.009] | 0.105 [0.049, 0.164]* | 2.5 [-2.4, 7.3]      |
|               | Adult Glucose | 0.121 (0.025)* | 0.067 (0.026)* | 0.048 (0.026)  | 0.003 [-0.001, 0.009] | 0.105 [0.049, 0.164]* | 2.5 [-2.4, 7.3]      |
| Adult BMI     | Adult SBP     | 0.084 (0.026)* | 0.161 (0.025)* | 0.140 (0.027)* | 0.022 [0.011, 0.037]* | 0.030 [-0.042, 0.106] | 26.2 [6.7, 45.7]*    |
|               | Adult LDLC    | 0.084 (0.026)* | 0.109 (0.028)* | 0.091 (0.025)* | 0.010 [0.003, 0.020]* | 0.030 [-0.042, 0.106] | 11.9 [1.0, 22.8]*    |
|               | Adult AIP     | 0.084 (0.026)* | 0.276 (0.025)* | 0.039 (0.028)  | 0.011 [-0.005, 0.028] | 0.030 [-0.042, 0.106] | 13.1 [-4.8, 31.0]    |
|               | Adult Glucose | 0.084 (0.026)* | 0.228 (0.026)* | 0.050 (0.027)  | 0.011 [-0.002, 0.026] | 0.030 [-0.042, 0.106] | 13.1 [-3.0, 29.2]    |
| BMI AUC       | Adult SBP     | 0.126 (0.025)* | 0.144 (0.025)* | 0.133 (0.027)* | 0.019 [0.009, 0.032]* | 0.088 [0.021, 0.161]* | 15.1 [5.3, 24.8]*    |
|               | Adult LDLC    | 0.126 (0.025)* | 0.047 (0.027)  | 0.093 (0.025)* | 0.004 [-0.001, 0.012] | 0.088 [0.021, 0.161]* | 3.2 [-1.5, 7.9]      |
|               | Adult AIP     | 0.126 (0.025)* | 0.197 (0.025)* | 0.032 (0.028)  | 0.006 [-0.005, 0.018] | 0.088 [0.021, 0.161]* | 4.8 [-4.3, 13.8]     |
|               | Adult Glucose | 0.126 (0.025)* | 0.236 (0.025)* | 0.037 (0.027)  | 0.009 [-0.005, 0.025] | 0.088 [0.021, 0.161]* | 7.1 [-4.7, 19.0]     |

c,  $\beta_1$ , and  $\beta_2$  are standardized regression coefficients (standardized errors).  $\beta_{Ind}$  and c' are standardized regression coefficients [95% confidence intervals]. Mediation effects are percentages [95% confidence intervals].

c=total effect; c'=direct effect;  $\beta_1$ =indirect effect 1;  $\beta_2$ =indirect effect 2;  $\beta_{Ind}$ =indirect effect ( $\beta_1 \times \beta_2$ )

\*,  $P < 0.05$  for being different from 0

cIMT=carotid intima-media thickness; BMI=body mass index; SBP=systolic blood pressure; LDLC=low-density lipoprotein cholesterol; AIP=atherogenic index of plasma; AUC=area under the curve

Covariates in the models were race, sex, follow-up years, adult age, smoking, alcohol drinking, antihypertensive, lipid-lowering and antidiabetic medications.

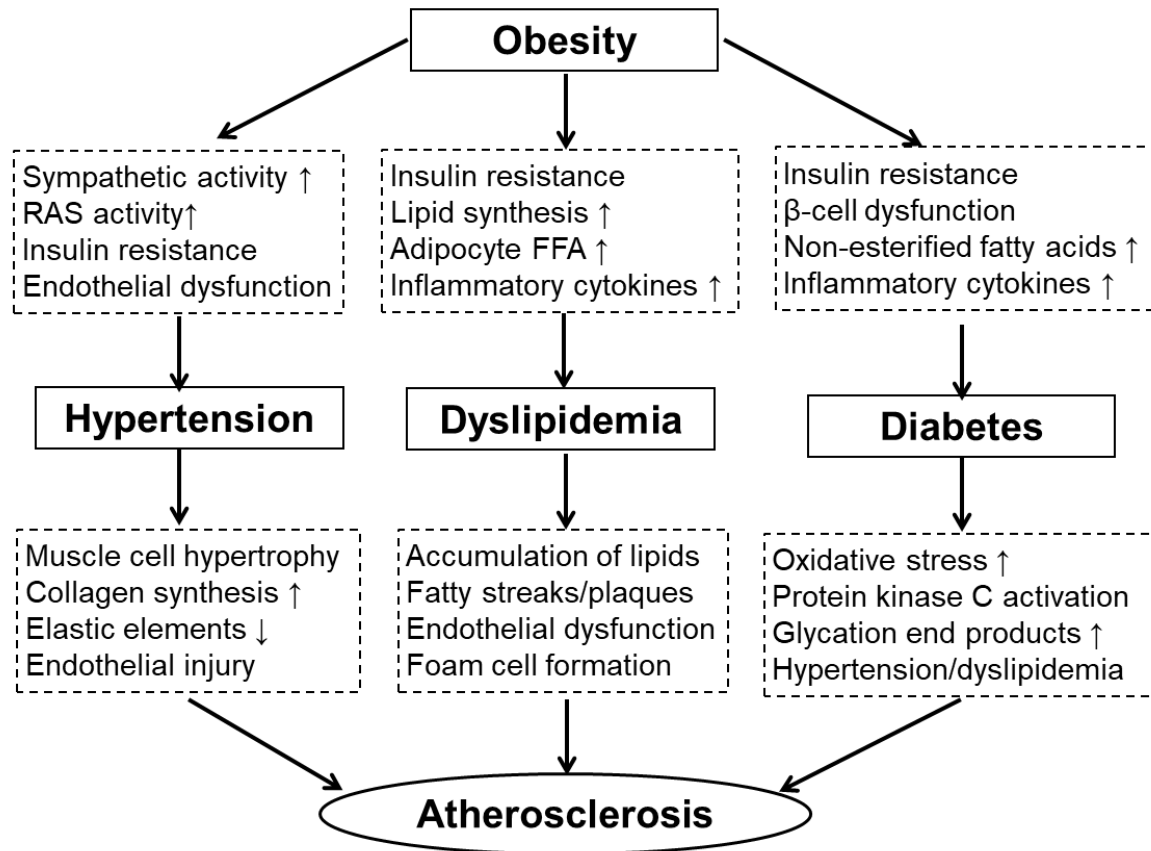

**Figure S1.** Biological mechanisms underlying the relationships between obesity, hypertension, dyslipidemia, diabetes and atherosclerosis

RAS=renin angiotensin system; FFA=free fatty acid

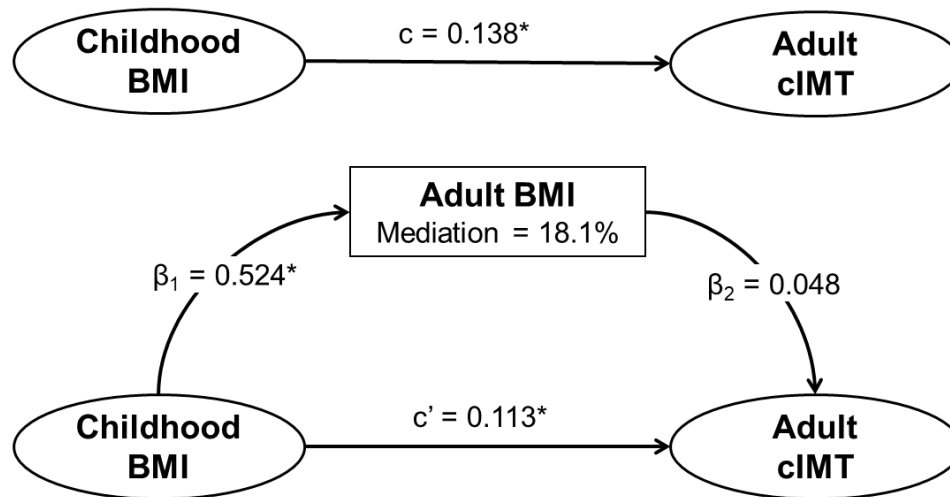

**Figure S2.** Mediation effect of adult BMI on the childhood BMI-adult cIMT association

$\beta$ ,  $c$  and  $c'$  are standardized regression coefficients.

$c$ =total effect;  $c'$ =direct effect;  $\beta_1$ =indirect effect 1;  $\beta_2$ =indirect effect 2;  $\beta_{\text{Ind}}$ =indirect effect ( $\beta_1 \times \beta_2$ ); BMI=body mass index; cIMT=carotid intima-media thickness

$\beta_{\text{Ind}} = 0.025$ ,  $P = 0.242$

\*  $P < 0.01$  for being different from 0

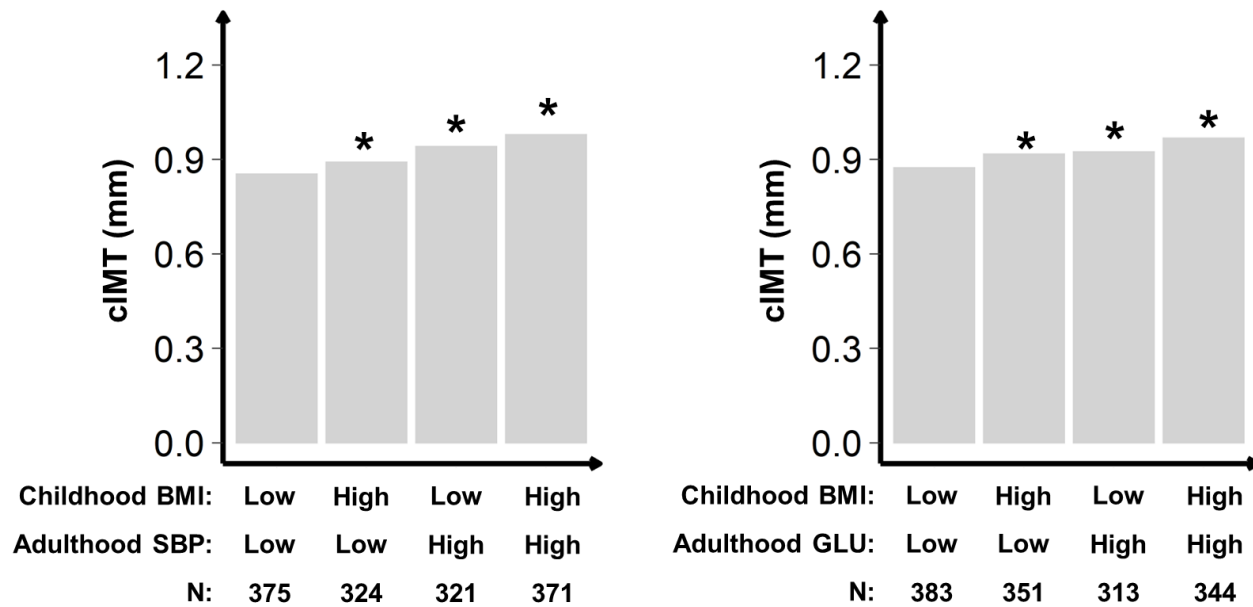

**Figure S3.** Least square means of adult cIMT, adjusted for race, sex, follow-up years, adult age, smoking and alcohol drinking, by subgroups  
 BMI=body mass index; SBP=systolic blood pressure; GLU=glucose; cIMT=carotid intima-media thickness  
 Low and high levels were defined by their race- and sex-specific medians.  
 \*, Bonferroni adjusted  $P < 0.05$  compared to the low-low group

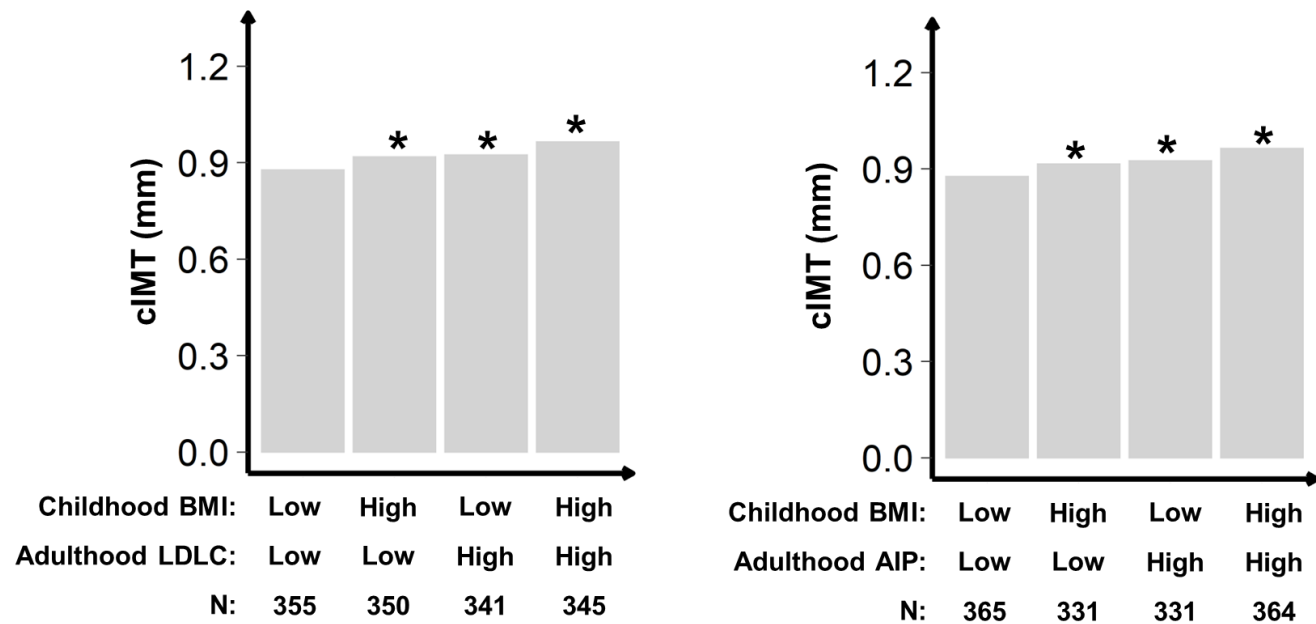

**Figure S4.** Least square means of adult cIMT, adjusted for race, sex, follow-up years, adult age, smoking and alcohol drinking, by subgroups

BMI=body mass index; LDLC=low-density lipoprotein cholesterol; AIP=atherogenic index of plasma; cIMT=carotid intima-media thickness

Low and high levels were defined by their race- and sex-specific medians.

\*, Bonferroni adjusted  $P < 0.05$  compared to the low-low group
